# Supplementary material for: Deconvolution of Human Brain Cell Type Transcriptomes Unraveled Microglia-Specific Potential Biomarkers
Source: PubMed Central journal article supplement (PMC5932158; doi:10.3389/fneur.2018.00266), 2018-04-26

Supplementary figure 1.

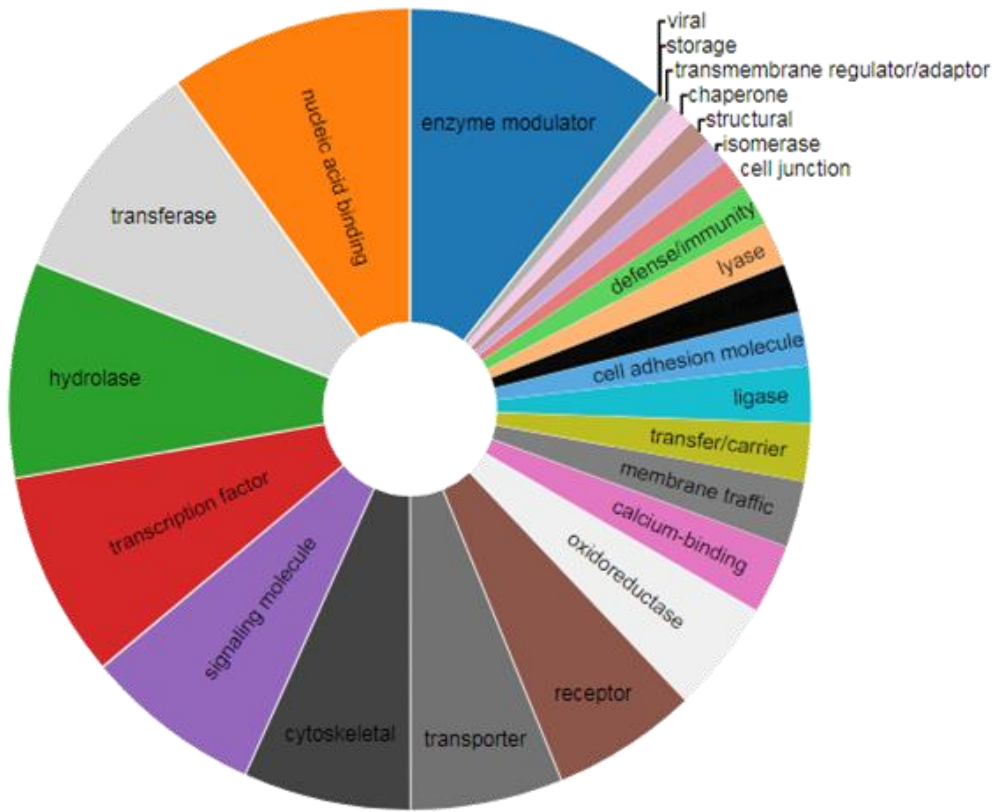

Supplementary figure 2.

### HIPPOCAMPUS

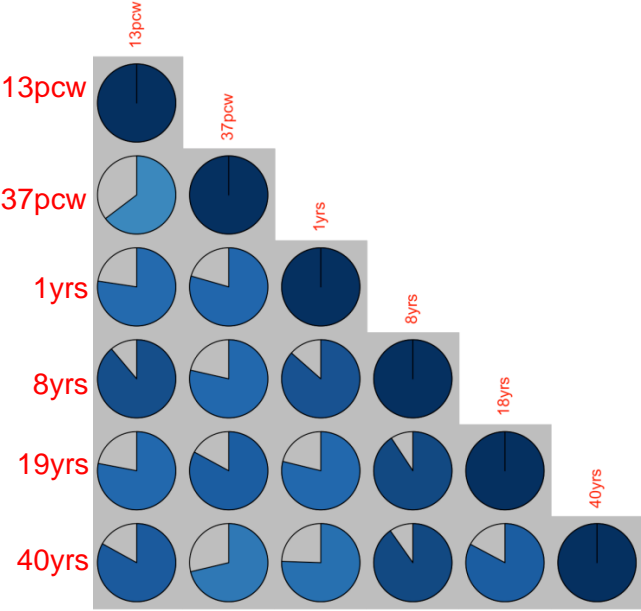

### STRIATUM

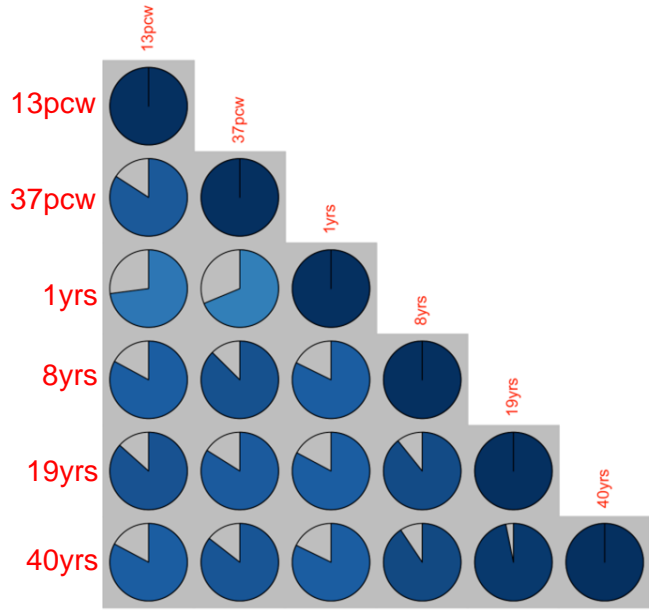

### AMYGDALA

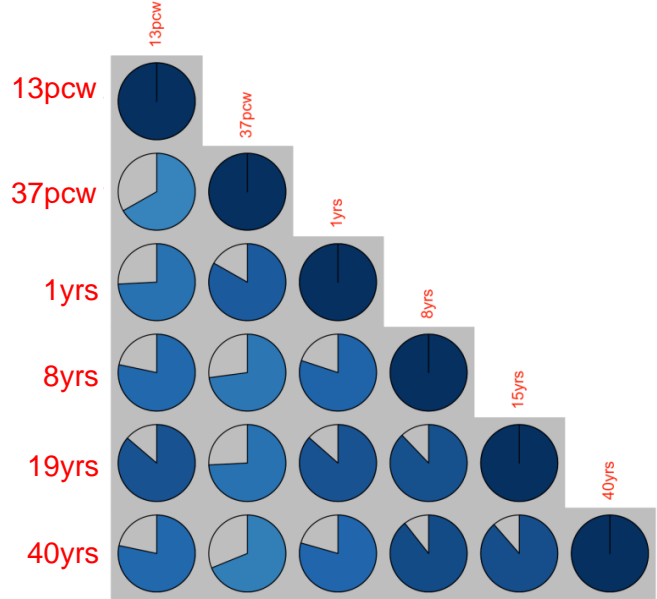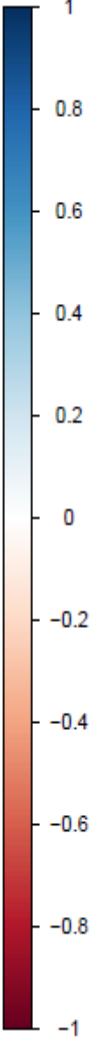

Supplement: image_1.pdf [file image_1.pdf]
